# Supplementary material
Source: PubMed Central journal article supplement (PMC6450545)
Supplement: NIHMS1010976-supplement-Supplementary.pdf [file NIHMS1010976-supplement-Supplementary.pdf]

## **Supporting Information**

### **Advancement in Photothermal Effect of Carbon Nanotubes by Grafting of Poly(amidoamine) and Deposition of CdS Nanocrystallites**

Gururaj M. Neelgund and Aderemi Oki\*

Department of Chemistry, Prairie View A&M University, Prairie View, TX 77446, United States

\*Corresponding author email: [aroki@pvamu.edu](mailto:aroki@pvamu.edu) (A. Oki)

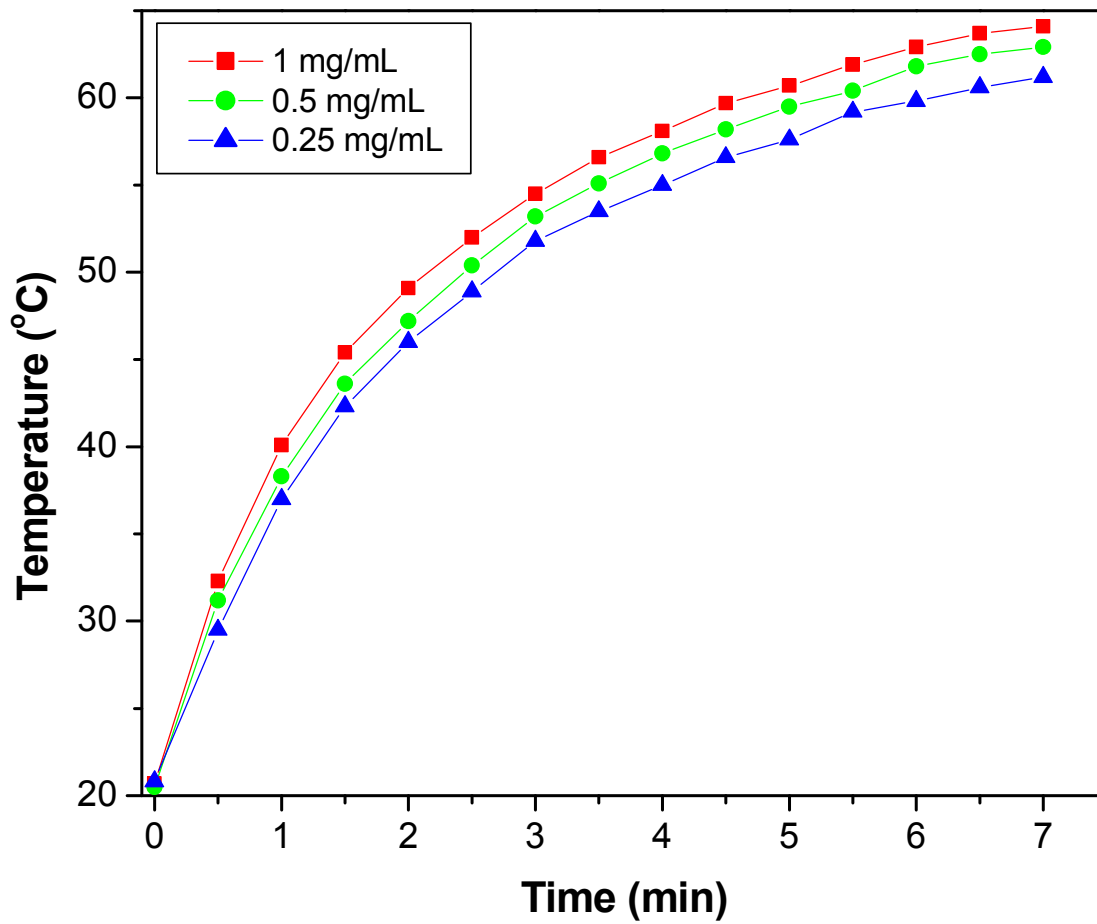

**Figure S1** Photothermal effect of CNTs-PAMAM/G4-CdS at different concentrations.

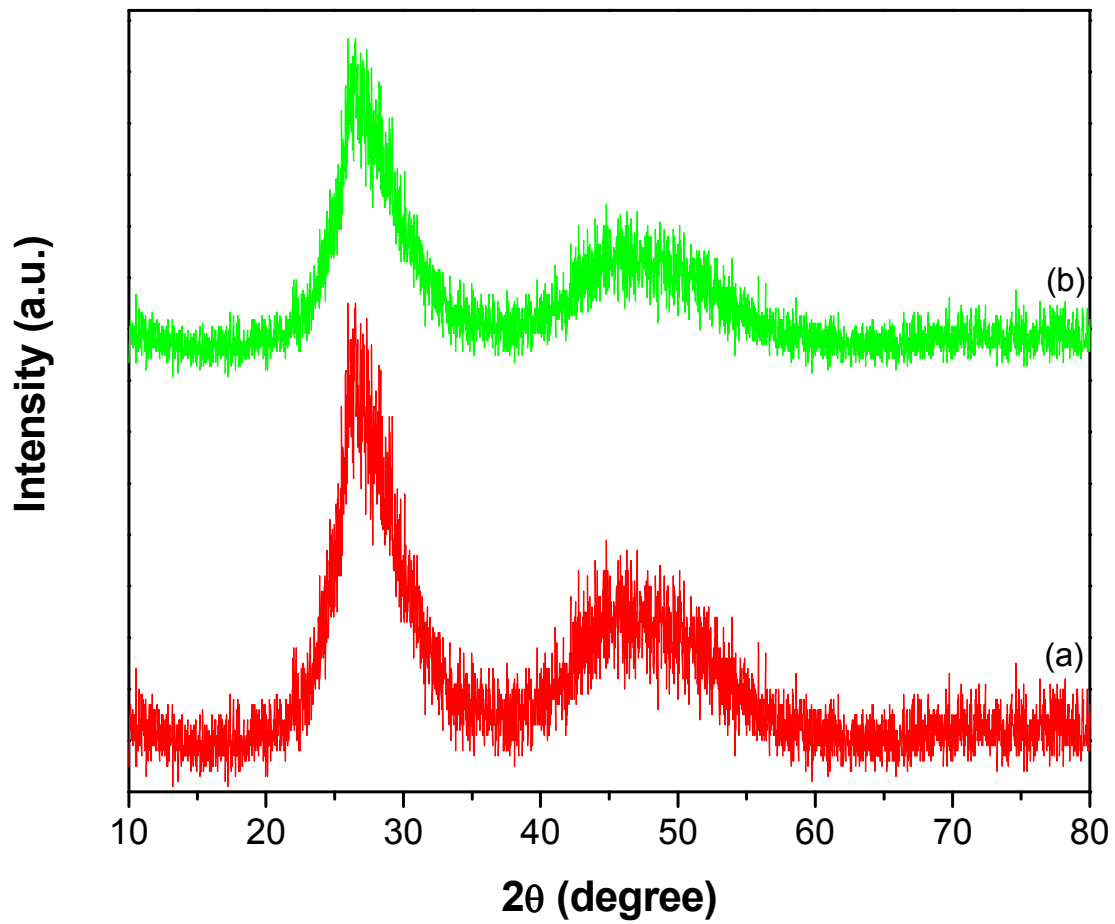

**Figure S2** XRD patterns of CNTs-PAMAM/G4-CdS (a) before and (b) after applying in three successive cycles of photothermal effect.
